# Supplementary material for: Switching of the redox centers of a tris-2-mercaptophenolato chromium(iii) metalloligand by a guest metal ion
Source: Royal Society of Chemistry journal article supplement (doi:10.1039/d2dt03502b), 2023-01-01
Supplement: d2dt03502b1.pdf [file d2dt03502b1.pdf]

Supporting information for

**Switching of the redox centers of a tris-2-mercaptophenolato chromium(III) metalloligand by a guest metal ion**

Masanori Wakizaka,<sup>a,b\*</sup> Takeshi Matsumoto,<sup>a</sup> and Ho-Chol Chang<sup>a,\*</sup>

<sup>a</sup> Department of Applied Chemistry, Faculty of Science and Engineering, Chuo University,  
1-13-27 Kasuga, Bunkyo-ku, Tokyo 112-8551, Japan

<sup>b</sup> Frontier Research Institute for Interdisciplinary Sciences, Tohoku University,  
6-3 Aramaki-Aza-Aoba, Aoba-ku, Sendai 980-8578, Japan.

E-mail: masanori.wakizaka.a7@tohoku.ac.jp (M. W.) and chang@kc.chuo-u.ac.jp (H.-C. C.)

## Contents

|    |                                                                                                                                                                              |
|----|------------------------------------------------------------------------------------------------------------------------------------------------------------------------------|
| 1  | <b>Methods</b>                                                                                                                                                               |
| 2  | <b>Table S1.</b> Crystallographic data for $\mathbf{1} \cdot x\text{H}_2\text{O}$                                                                                            |
| 3  | <b>Table S2.</b> Selected bond distances of $\mathbf{1} \cdot x\text{H}_2\text{O}$                                                                                           |
| 4  | <b>Figure S1.</b> Crystal structure of $\mathbf{1} \cdot x\text{H}_2\text{O}$                                                                                                |
| 5  | <b>Figure S2.</b> The calibration curve for the ICP-AES measurement                                                                                                          |
| 6  | <b>Figure S3.</b> ICP-AES spectra of $\mathbf{1} \cdot x\text{H}_2\text{O}$                                                                                                  |
| 7  | <b>Table S3.</b> Summary of ICP-AES measurement                                                                                                                              |
| 8  | <b>Figure S4.</b> XRF spectra of $\mathbf{1} \cdot x\text{H}_2\text{O}$                                                                                                      |
| 9  | <b>Figure S5.</b> CVs of $[\text{Me}_4\text{N}]_3[\text{fac-Cr}(\text{mp})_3]$ upon addition of $\text{Co}^{\text{II}}(\text{ClO}_4)_2 \cdot 6\text{H}_2\text{O}$            |
| 10 | <b>Figure S6.</b> CVs at the potential range around the first oxidation process                                                                                              |
| 11 | <b>Figure S7.</b> The $i-t$ curve of $[\text{Me}_4\text{N}]_3[\text{fac-Cr}(\text{mp})_3]$ with 0.5 eq. of $\text{Co}^{\text{II}}(\text{ClO}_4)_2 \cdot 6\text{H}_2\text{O}$ |
| 12 | <b>Figure S8.</b> CV of $\text{Co}^{\text{II}}(\text{ClO}_4)_2 \cdot 6\text{H}_2\text{O}$ in MeCN                                                                            |
| 13 | <b>Figure S9.</b> $\chi_m T-T$ plots for $\mathbf{1} \cdot x\text{H}_2\text{O}$                                                                                              |
| 14 | <b>References</b>                                                                                                                                                            |

## Methods

**Materials.**  $\text{CoCl}_2 \cdot 6\text{H}_2\text{O}$ ,  $\text{Co}(\text{ClO}_4)_2 \cdot 6\text{H}_2\text{O}$ ,  $\text{KOH}$ , and tetra-*n*-butylammonium hexafluorophosphate ( $[\text{nBu}_4\text{N}]\text{PF}_6$ ) were purchased from Wako Pure Chemical Industries (Japan). Dehydrated MeOH and dehydrated MeCN were purchased from Kanto Chemical Co. Inc (Japan). Tetramethylammonium hydroxide pentahydrate ( $[\text{Me}_4\text{N}]\text{OH} \cdot 5\text{H}_2\text{O}$ ) and 2-mercaptophenol ( $\text{mpH}_2$ ) were purchased from Tokyo Kasei Kogyo Co. Ltd (Japan). All solvents used were degassed by  $\text{N}_2$  bubbling and following five freeze-pump-thaw cycles immediately prior to use.  $[\text{Me}_4\text{N}]_3[\text{fac-Cr}^{\text{III}}(\text{mp})_3]$  and  $[\text{K}_3\{\text{fac-Cr}^{\text{III}}(\text{mp})_3\}(\text{H}_2\text{O})_6]_n$  were prepared according to the reported procedures.<sup>33</sup> **Caution!** Although we did not experience any difficulties with perchlorate salts, these should be regarded as potentially explosive, and therefore handled with the utmost care.

**$\text{K}_y[\text{Co}^{\text{II}}(\text{H}_2\text{O})_6]_{1.5-0.5y}[\text{Co}^{\text{III}}\{\text{fac-Cr}^{\text{III}}(\text{mp})_3\}_2] \cdot x\text{H}_2\text{O}$  ( $1 \cdot x\text{H}_2\text{O}$ ).** Adding a pink aqueous solution (10 mL) of  $\text{CoCl}_2 \cdot 6\text{H}_2\text{O}$  (95.0 mg, 0.399 mmol) to a green aqueous solution (10 mL) of  $[\text{K}_3\{\text{fac-Cr}^{\text{III}}(\text{mp})_3\}(\text{H}_2\text{O})_6]_n$  (200 mg, 0.299 mmol) afforded an olive-green suspension after stirring for 1 h under an atmosphere of  $\text{N}_2$  using Schlenk-line techniques. After filtration, an olive-green solution was obtained, whose color turned to purple upon exposure to air. From this solution, purple crystals were obtained after standing for 1 day. After filtration and washing with water ( $3 \times 5$  mL), followed by drying *in vacuo*, complex  $1 \cdot x\text{H}_2\text{O}$  was isolated in the form of violet crystals in 15% yield. The crystals of  $1 \cdot x\text{H}_2\text{O}$  easily loss the crystal and hydrated water molecules under drying *in vacuo*. Anal. Found: C, 38.20; H, 3.38%. Calc. for  $\text{C}_{36}\text{H}_{39.6}\text{Co}_{2.4}\text{Cr}_2\text{K}_{0.2}\text{O}_{13.8}\text{S}_6$  ( $1-0.6\text{H}_2\text{O}$ ,  $y = 0.2$ ): C, 37.97; H, 3.51%. ICP-AES Found: Co, 12.4; Cr, 9.43; K, 0.77%. Calc. for  $1-0.6\text{H}_2\text{O}$  ( $y = 0.2$ ): Co, 12.4; Cr, 9.13, K, 0.69%. Violet

single crystals suitable for X-ray diffraction analysis were obtained by layering an aqueous solution of  $\text{CoCl}_2 \cdot 6\text{H}_2\text{O}$  onto an aqueous solution of  $[\text{K}_3\{\text{fac-Cr}^{\text{III}}(\text{mp})_3\}(\text{H}_2\text{O})_6]_n$ .

**Physical Measurements.** Elemental analysis was carried out on a Perkin-Elmer 2400 II CHN analyzer. The inductively coupled plasma-atomic emission spectrometry (ICP-AES) analysis was performed by using a Shimadzu ICPE-9000 at the Research and Analytical Center for Giant Molecules (Tohoku Univ.). X-ray Fluorescence (XRF) spectra were recorded on a Rigaku NEX DE at the Rigaku corporation Tokyo plant. Solution and in the solid state (KBr pellets) absorption spectra (200-3300 nm) were recorded on a Hitachi U-4100 spectrophotometer at room temperature. Cyclic voltammetry (CV) and differential pulse voltammetry (DPV) measurements were recorded on a BAS model 650A electrochemical analyzer, using a glassy carbon (GC) working electrode and a platinum (Pt) auxiliary electrode under an atmosphere of  $\text{N}_2$  at room temperature. The reference electrode consisted of a silver wire, inserted into a small glass tube fitted with a porous Vycor frit at the tip, filled with a MeCN solution containing 0.1 M  $[\text{nBu}_4\text{N}]\text{ClO}_4$  and 0.01 M  $\text{AgNO}_3$ . All three electrodes were immersed in 2 mL of a MeCN solution containing 0.1 M  $[\text{nBu}_4\text{N}]\text{PF}_6$  as the supporting electrolyte and 1 mM analyte. Redox potentials were measured relative to the  $\text{Ag}/\text{Ag}^+$  redox couple. Spectroelectrochemical measurements were carried out in 0.1 M  $[\text{nBu}_4\text{N}]\text{PF}_6$  solution using Pt, Pt mesh, and the reference electrodes under an atmosphere of  $\text{N}_2$ . The magnetic measurement was performed using a magnetic property measurement system (MPMS-XL, Quantum Design) in the direct current mode. The sample was filled into a gelatin capsule (Matsuya) which was fixed in a plastic straw.

**Collection of crystallographic data and structure refinements.** A suitable single crystal of  $1 \cdot x\text{H}_2\text{O}$  was selected and mounted onto a MicroMount (MiTeGen) in an XtaLAB Synergy R, DW system, HyPix diffractometer. The crystal was kept at 120 K using a  $\text{N}_2$  flow-type temperature controller during data collection. Using Olex2,<sup>S1</sup> the structure was solved with the ShelXT<sup>S2</sup> structure solution program using intrinsic phasing and refined with the ShelXL<sup>S3</sup> refinement package using least-squares minimization. A summary of the crystallographic data for  $1 \cdot x\text{H}_2\text{O}$  is shown in Table S1. The X-ray crystallographic coordinates used for the structure determination reported in this article have been deposited at the Cambridge Crystallographic Data Centre (CCDC) under deposition numbers CCDC-2104264. The data can be obtained free of charge from The Cambridge Crystallographic Data Centre via [www.ccdc.cam.ac.uk/data\\_request/cif](http://www.ccdc.cam.ac.uk/data_request/cif).

**Simulations of magnetism.**  $\chi_m T$  was simulated using the program PHI with the spin Hamiltonian of equations S1 and S2:<sup>S4</sup>

$$\hat{\mathcal{H}}_{ZEE} = \mu_B \hat{\mathbf{S}} \cdot g \cdot \hat{\mathbf{B}} \quad (\text{eq. S1})$$

$$\hat{\mathcal{H}}_{SO} = \lambda \hat{\mathbf{L}} \cdot \hat{\mathbf{S}} \quad (\text{eq. S2})$$

where  $\mu_B$ ,  $g$ ,  $\lambda$ ,  $\mathbf{S}$  and  $\mathbf{L}$  with hats, and  $\mathbf{B}$  refer to the Bohr magneton,  $g$ -factor, spin-orbit coupling constant, operators of spin and orbit, and magnetic field, respectively.

**Table S1.** Crystallographic data for **1·xH<sub>2</sub>O**

|                                                |                                                                                               |
|------------------------------------------------|-----------------------------------------------------------------------------------------------|
| Formula                                        | $\text{K}_{0.2}\text{Co}_{2.4}\text{Cr}_2\text{C}_{36}\text{O}_{25.5}\text{S}_6\text{H}_{24}$ |
| Formula weight                                 | 1310.16                                                                                       |
| Crystal size (mm <sup>3</sup> )                | 0.2 × 0.2 × 0.1                                                                               |
| Crystal system                                 | triclinic                                                                                     |
| Space group                                    | <i>P</i> -1 (No. 2)                                                                           |
| <i>a</i> (Å)                                   | 12.6211(2)                                                                                    |
| <i>b</i> (Å)                                   | 14.7753(3)                                                                                    |
| <i>c</i> (Å)                                   | 16.6912(3)                                                                                    |
| $\alpha$ (°)                                   | 70.242(2)                                                                                     |
| $\beta$ (°)                                    | 73.531(2)                                                                                     |
| $\gamma$ (°)                                   | 88.9980(10)                                                                                   |
| <i>V</i> (Å <sup>3</sup> )                     | 2798.56(10)                                                                                   |
| <i>T</i> (K)                                   | 120                                                                                           |
| <i>Z</i>                                       | 2                                                                                             |
| <i>D</i> <sub>calc</sub> (g cm <sup>-3</sup> ) | 1.555                                                                                         |
| <i>F</i> (000)                                 | 1303.0                                                                                        |
| $\mu$ (Mo K $\alpha$ ) (cm <sup>-1</sup> )     | 10.513                                                                                        |
| Reflections collected                          | 89620                                                                                         |
| Independent reflections                        | 17209                                                                                         |
| Data/restraints/parameters                     | 17209/0/706                                                                                   |
| GOF on <i>F</i> <sup>2</sup>                   | 1.058                                                                                         |
| <i>R</i> <sub>int</sub>                        | 0.0518                                                                                        |
| <i>R</i> <sub>1</sub> <sup>a</sup>             | 0.0620                                                                                        |
| <i>wR</i> <sub>2</sub> <sup>b</sup> (all data) | 0.1817                                                                                        |

<sup>a</sup>  $R_1 = \frac{\sum ||F_o| - |F_c||}{\sum |F_o|}$ . <sup>b</sup>  $wR_2 = \left\{ \frac{\sum w(F_o^2 - F_c^2)^2}{\sum w(F_o^2)^2} \right\}^{1/2}$ .

**Table S2.** Selected bond distances of  $1 \cdot x\text{H}_2\text{O}$ 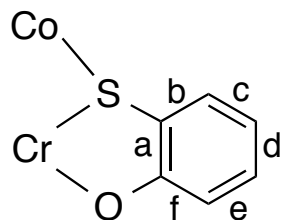

| Bond distance [Å] | L1        | L2        | L3        | L4        | L5        | L6        |
|-------------------|-----------|-----------|-----------|-----------|-----------|-----------|
| Co–S              | 2.3096(7) | 2.2940(7) | 2.3098(8) | 2.2968(7) | 2.3116(7) | 2.3111(7) |
| Cr–S              | 2.3528(9) | 2.3413(9) | 2.3345(8) | 2.3443(9) | 2.3601(9) | 2.3323(8) |
| Cr–O              | 1.979(2)  | 1.963(2)  | 1.969(2)  | 1.965(2)  | 1.974(2)  | 1.973(2)  |
| C–S               | 1.775(3)  | 1.773(3)  | 1.766(3)  | 1.772(3)  | 1.777(3)  | 1.762(3)  |
| C–O               | 1.349(3)  | 1.352(4)  | 1.351(4)  | 1.353(4)  | 1.354(4)  | 1.350(4)  |
| C–C (a)           | 1.411(4)  | 1.404(4)  | 1.410(4)  | 1.407(4)  | 1.406(4)  | 1.414(4)  |
| C–C (b)           | 1.402(5)  | 1.405(4)  | 1.401(4)  | 1.396(4)  | 1.403(5)  | 1.404(5)  |
| C–C (c)           | 1.390(5)  | 1.383(5)  | 1.394(5)  | 1.386(5)  | 1.390(5)  | 1.384(6)  |
| C–C (d)           | 1.395(6)  | 1.394(6)  | 1.387(6)  | 1.385(5)  | 1.390(5)  | 1.382(6)  |
| C–C (e)           | 1.385(5)  | 1.384(5)  | 1.387(5)  | 1.386(4)  | 1.388(5)  | 1.393(5)  |
| C–C (f)           | 1.396(4)  | 1.396(4)  | 1.398(4)  | 1.395(4)  | 1.399(4)  | 1.395(4)  |

Ligands 1–6 (L1–L6) contain S1, S2, S3, S4, S5, and S6, respectively. See also Figure 2.

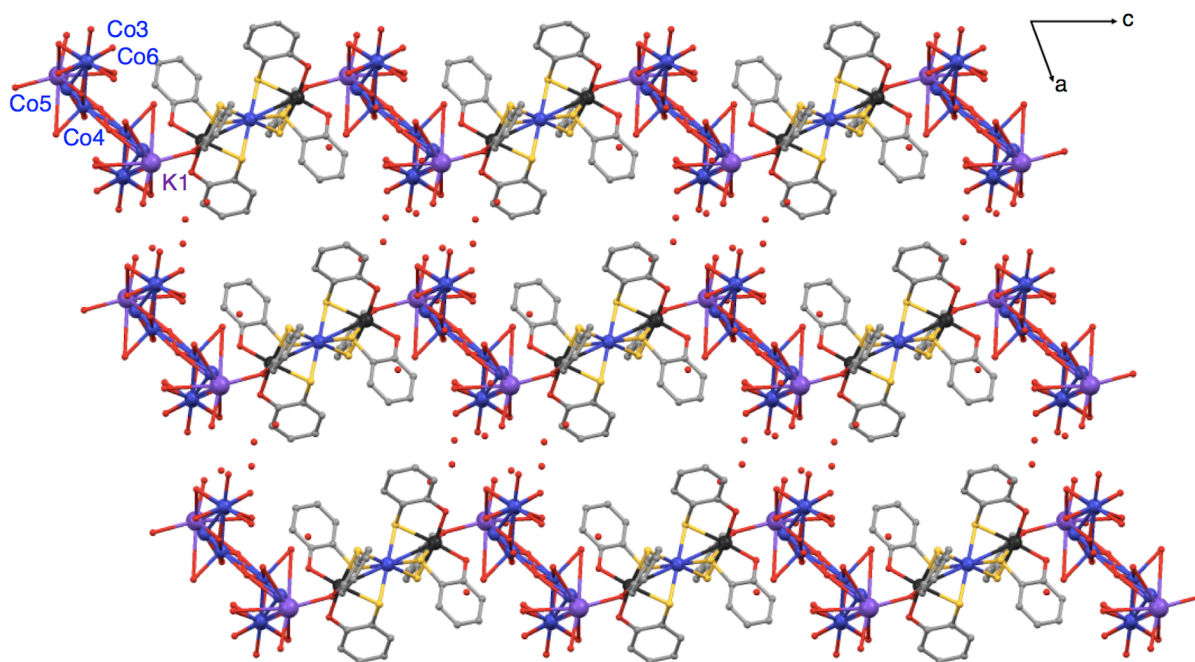

**Figure S1.** Crystal structure of  $1 \cdot x\text{H}_2\text{O}$  with a ball-and stick model. Color code: Cr = black, Co = blue, S = yellow, O = red, and C = grey. Hydrogen atoms have been omitted for clarity, and only selected atoms are labeled.



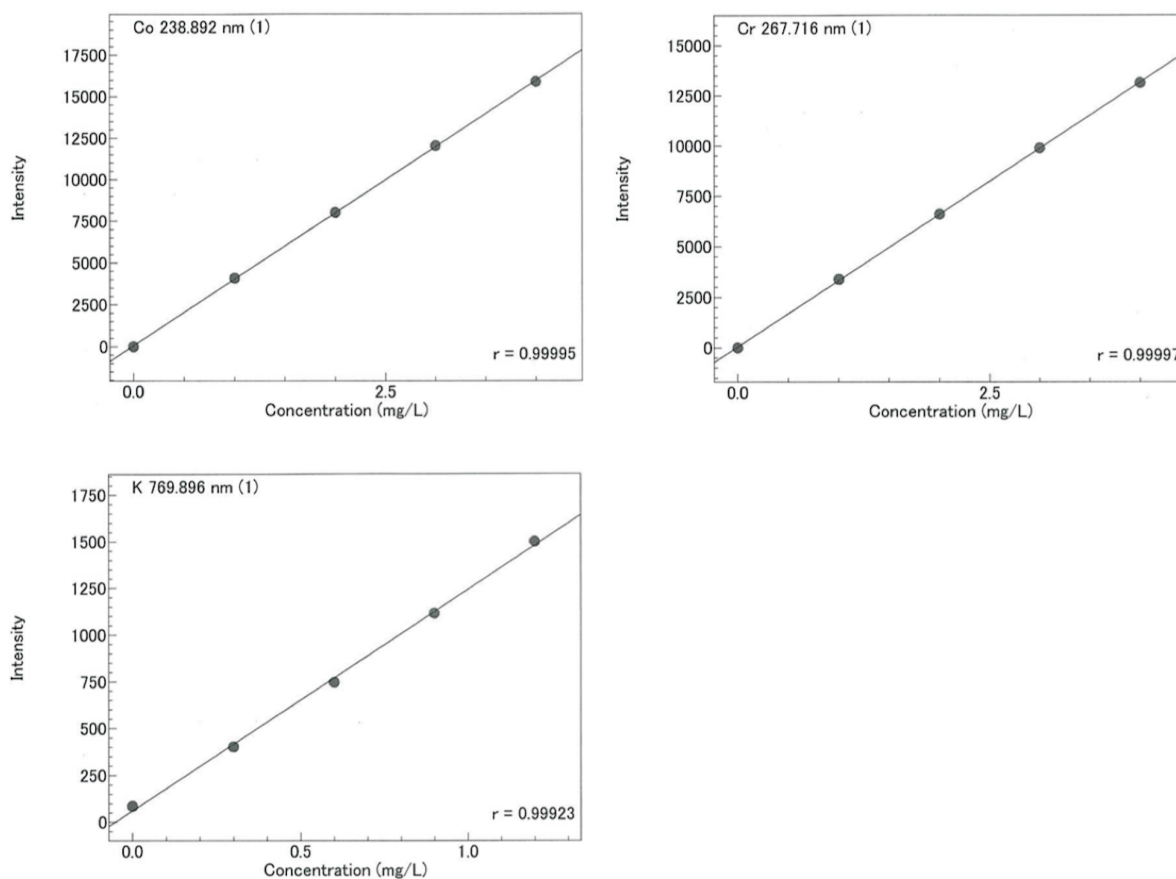

**Figure S2.** The calibration curve of ICP-AES analysis for Co, Cr, and K. Standards were used acidic (0.5% HNO<sub>3</sub> and 0.7% HCl) aqueous solutions containing Co:Cr:K=1:1:0.3, 2:2:0.6, 3:3:0.9, and 4:4:1.2 (ppm).

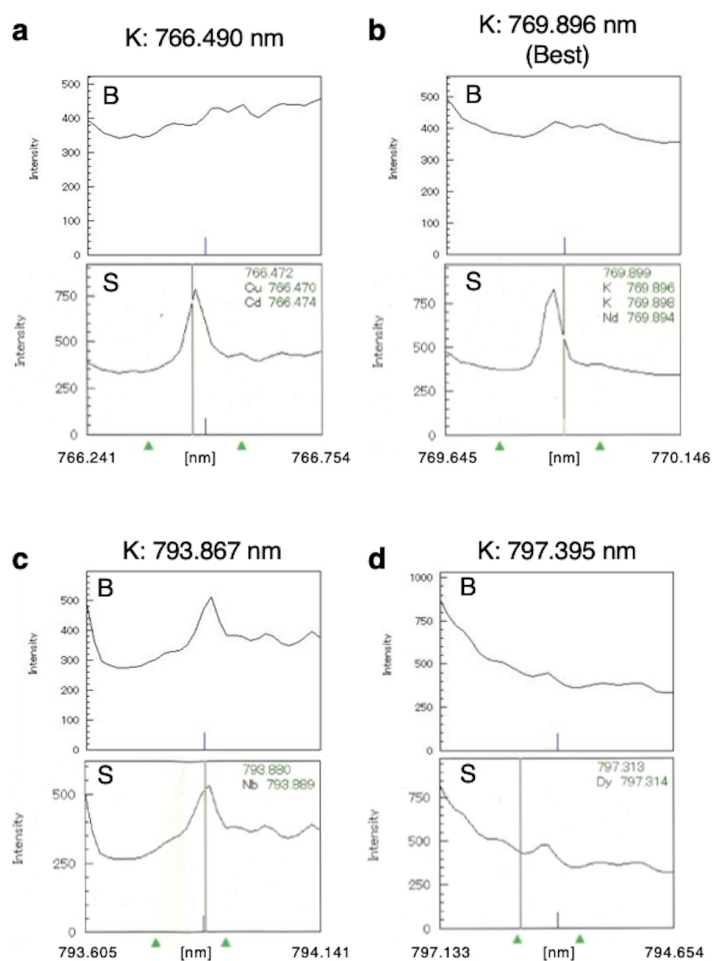

**Figure S3.** ICP-AES spectra of  $1 \cdot x\text{H}_2\text{O}$  (S: sample) in the range of K ion around (a) 766 nm, (b) 769 nm, (c) 793 nm, and (d) 797 nm, together with the blank solution (B). Inset elements are potential spectral interference species.

**Table S3.** Summary of ICP-AES measurement of  $1 \cdot x\text{H}_2\text{O}$

| Element           | Co   | Cr   | K     |
|-------------------|------|------|-------|
| [ppm]             | 2.63 | 2.00 | 0.163 |
| [wt%]             | 12.4 | 9.4  | 0.77  |
| [ $\mu\text{M}$ ] | 45   | 38   | 4.2   |
| mol eq.           | 1.2  | 1.0  | 0.1   |

The sample solution was prepared from  $1 \cdot x\text{H}_2\text{O}$  (2.12 mg) and 100 mL acidic (0.5%  $\text{HNO}_3$  and 0.7%  $\text{HCl}$ ) deionized water.

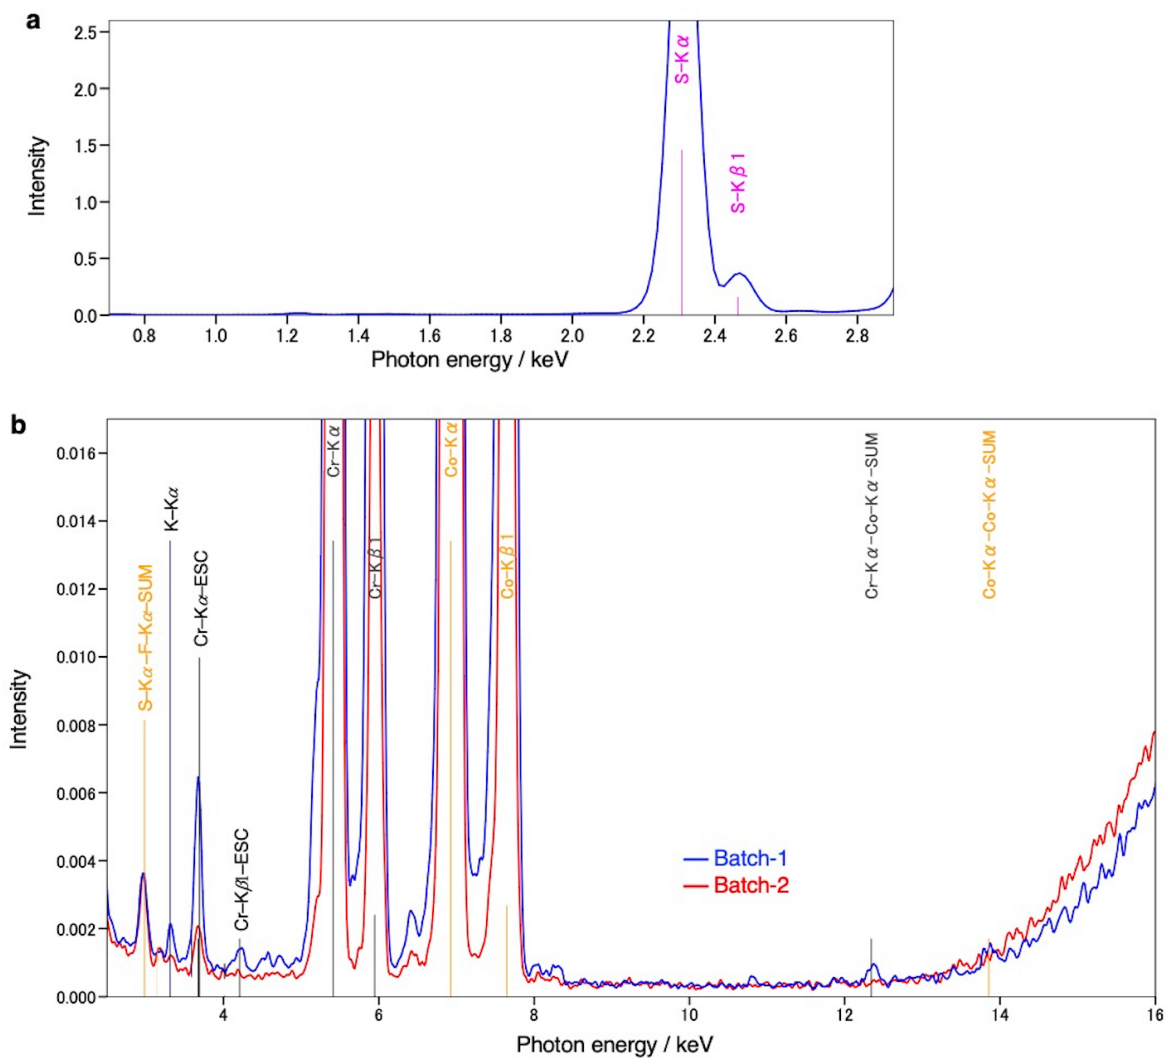

**Figure S4.** XRF spectra of  $1 \cdot x\text{H}_2\text{O}$  in the (a) low and (b) middle energy regions. \*F is derived from a film or a sample container.

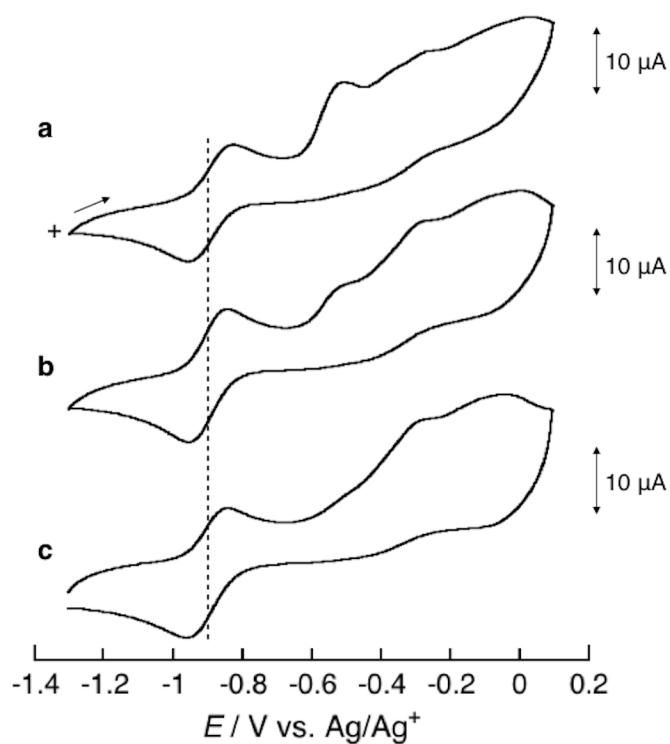

**Figure S5.** CVs of  $[\text{Me}_4\text{N}]_3[\text{fac-Cr}(\text{mp})_3]$  (1.0 mM) upon addition of (a) 0.5, (b) 0.75, and (c) 1.0 eq. of  $\text{Co}^{\text{II}}(\text{ClO}_4)_2 \cdot 6\text{H}_2\text{O}$ , measured at  $50 \text{ mV s}^{-1}$  with 0.1 M  $[\text{nBu}_4\text{N}]\text{PF}_6$  in MeCN under an atmosphere of  $\text{N}_2$  using GC, Pt,  $\text{Ag}/\text{Ag}^+$  electrodes.

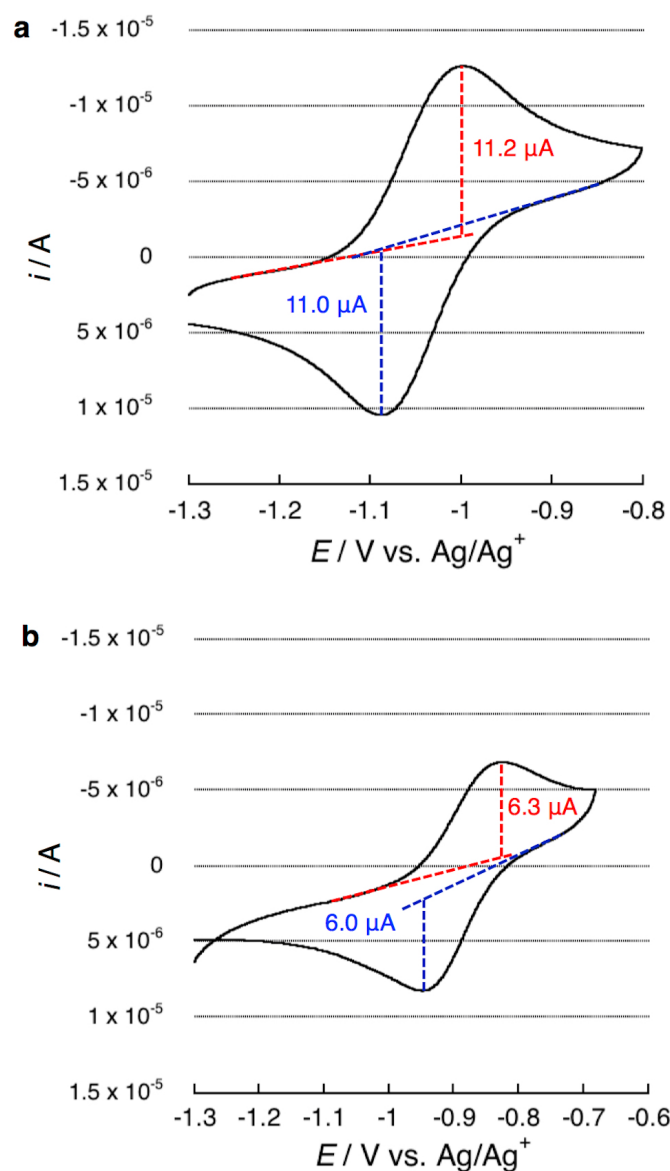

**Figure S6.** CVs of  $[Me_4N]_3[fac-Cr(mp)_3]$  (1 mM) upon addition of (a) 0 and (b) 0.5 eq. of  $Co^{II}(ClO_4)_2 \cdot 6H_2O$ , at the potential range around the first oxidation process measured at  $50 \text{ mV s}^{-1}$  with  $0.1 \text{ M } [nBu_4N]PF_6$  in MeCN under an atmosphere of  $N_2$  using GC, Pt,  $Ag/Ag^+$  electrodes.

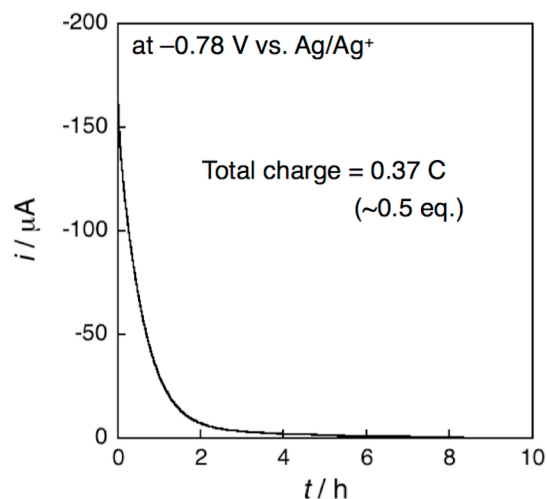

**Figure S7.** The  $i$ - $t$  curve of  $[\text{Me}_4\text{N}]_3[\text{fac-Cr}(\text{mp})_3]$  ( $8.0 \mu\text{mol}$ ) upon addition of 0.5 eq. of  $\text{Co}^{\text{II}}(\text{ClO}_4)_2 \cdot 6\text{H}_2\text{O}$  ( $4.0 \mu\text{mol}$ ), with  $0.1 \text{ M } [n\text{Bu}_4\text{N}]\text{PF}_6$  in MeCN under an atmosphere of  $\text{N}_2$  using Pt and  $\text{Ag/Ag}^+$  electrode. The counter Pt electrode was separated by porous glass.

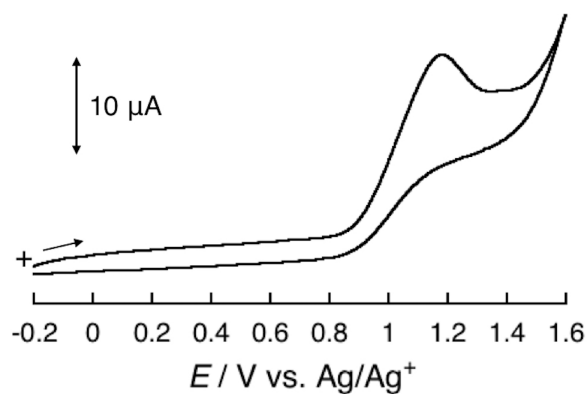

**Figure S8.** CV of  $\text{Co}^{\text{II}}(\text{ClO}_4)_2 \cdot 6\text{H}_2\text{O}$  ( $1 \text{ mM}$ ) measured at  $50 \text{ mV s}^{-1}$  with  $0.1 \text{ M } [n\text{Bu}_4\text{N}]\text{PF}_6$  in MeCN under an atmosphere of  $\text{N}_2$  using GC, Pt,  $\text{Ag/Ag}^+$  electrodes.

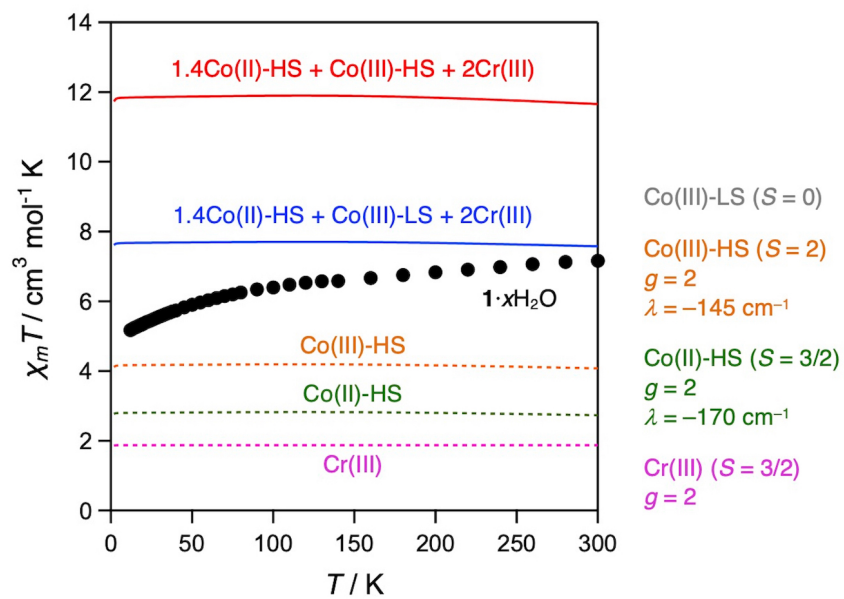

**Figure S9.**  $\chi_m T$ - $T$  plots for  $1 \cdot x\text{H}_2\text{O}$  together with those of simulations and parameters ( $g$ -factor and spin-orbit coupling energy ( $\lambda$ )). HS and LS represent high-spin and low spin states, respectively.

## References

- (S1) O. V. Dolomanov, L. J. Bourhis, R. J. Gildea, J. A. K. Howard, H. Puschmann, *J. Appl. Crystallogr.* 2009, **42**, 339–341.
- (S2) G. M. Sheldrick, *Acta Crystallogr., Sect. A: Found. Adv.* 2015, **A71**, 3–8.
- (S3) G. M. Sheldrick, *Acta Crystallogr., Sect. C: Struct. Chem.* 2015, **C71**, 3–8.
- (S4) N. F. Chilton, R. P. Anderson, L. D. Turner, A. Soncini, K. S. Murray, *J. Comput. Chem.* 2013, **34**, 1164–1175.
